# Supplementary material for: Enhancing Employability Skills of Biology Graduates through an Interdisciplinary Project-Based Service Learning Experience with Engineering and Translation Undergraduate Students
Source: MDPI journal article supplement (doi:10.3390/educsci14010095), 2024-01-16
Supplement: s1 [file s1]

Archive with 1 entries (1 files):
- education-2802685-supplementary.pdf
