# Supplementary material for: Enhancing Employability Skills of Biology Graduates through an Interdisciplinary Project-Based Service Learning Experience with Engineering and Translation Undergraduate Students
Source: MDPI journal article supplement (doi:10.3390/educsci14010095), 2024-01-16
Supplement: s1 [file s1 › education-2802685-supplementary.pdf]

**Table S1:** Schedule activities and deliveries carried out in this study during the course (15 weeks)

| <b>Week</b> | <b>Activity</b>                                                                                                                                                                                                                                                                                                                                                                                                                                                                                                                                                                                        | <b>Delivery</b>                                                                             |
|-------------|--------------------------------------------------------------------------------------------------------------------------------------------------------------------------------------------------------------------------------------------------------------------------------------------------------------------------------------------------------------------------------------------------------------------------------------------------------------------------------------------------------------------------------------------------------------------------------------------------------|---------------------------------------------------------------------------------------------|
| 1           | 1.- Undergraduate biology students (4) randomly constituted a teamwork (20).<br>2.- Each team select a real problem to solve from a given project list or propose a new one.<br>3.- Received oral presentation and project rubrics<br>4.- Received guidelines about how to proceed with the project development.                                                                                                                                                                                                                                                                                       | Each initial teamwork elect their project.                                                  |
| 2           | 1.- Undergraduate engineering (2-3 ) and translation students (1-2) joint any of the listed 20 teamwork.<br>2.- Each teamwork (6-9) must guarantee race, gender, culture and so on diversity.                                                                                                                                                                                                                                                                                                                                                                                                          | Multidisciplinary PBSL teamwork.                                                            |
| 3-8         | 1.- Students implement the PBSL using digital tools to share and use information.<br>2.- Teachers use the Moodle course management software to give information about the syllabus and schedules of lectures, seminars, presentations and so on.<br>3.- Seminars to check PBSL development carried out in each specific course by their specific teachers by assessing their specific knowledge acquisition in biology, engineering and translation.<br>4.- Multidisciplinary teamwork meetings: teachers met with all students of each teamwork in order to evaluate transferable skills acquisition. | Feed-back (3) to students on weeks: 3 <sup>er</sup> , 5 <sup>th</sup> and 8 <sup>th</sup> . |
| 9           | Evaluation and grading of first version of:<br>1.- Written report of each PBSL<br>2.- First oral presentation of each PBSL                                                                                                                                                                                                                                                                                                                                                                                                                                                                             | First grades of PBSL report.<br>Feed-back of the oral presentation.                         |
| 10          | Student autonomous working week                                                                                                                                                                                                                                                                                                                                                                                                                                                                                                                                                                        | No deliveries                                                                               |
| 11          | Written test evaluation to evaluate specific knowledge acquisition                                                                                                                                                                                                                                                                                                                                                                                                                                                                                                                                     | Grading of written test (100%)                                                              |
| 12          | Student autonomous working week                                                                                                                                                                                                                                                                                                                                                                                                                                                                                                                                                                        |                                                                                             |
| 13          | Evaluation and grading by specific field teachers of final version of:<br>1.- Written report of the PBSL<br>2.- Oral presentation                                                                                                                                                                                                                                                                                                                                                                                                                                                                      | Grading of written test (100%)<br>Grading (50%) of oral presentation                        |
| 14          | Final multidisciplinary oral presentation (scientific congress format)<br>Student and teachers satisfaction questionnaire                                                                                                                                                                                                                                                                                                                                                                                                                                                                              | Grading (50%) of oral presentation<br>Satisfaction questionnaire                            |
| 15          | Teachers meeting for written test, report and oral presentation evaluation                                                                                                                                                                                                                                                                                                                                                                                                                                                                                                                             | Final Grading                                                                               |
